# Supplementary material for: Giant magnetic moments of B and C doped cuboctahedral Mn13 clusters
Source: Royal Society of Chemistry journal article supplement (doi:10.1039/c3nr33612c), 2013-01-01
Supplement: c3nr33612c.pdf [file c3nr33612c.pdf]

# Supplementary Information

## Giant Magnetic Moments of B and C doped Cuboctahedral $Mn_{13}$ Clusters

Menghao Wu\* and Puru Jena

Physics Department, Virginia Commonwealth University, Richmond, VA  
23284-2000

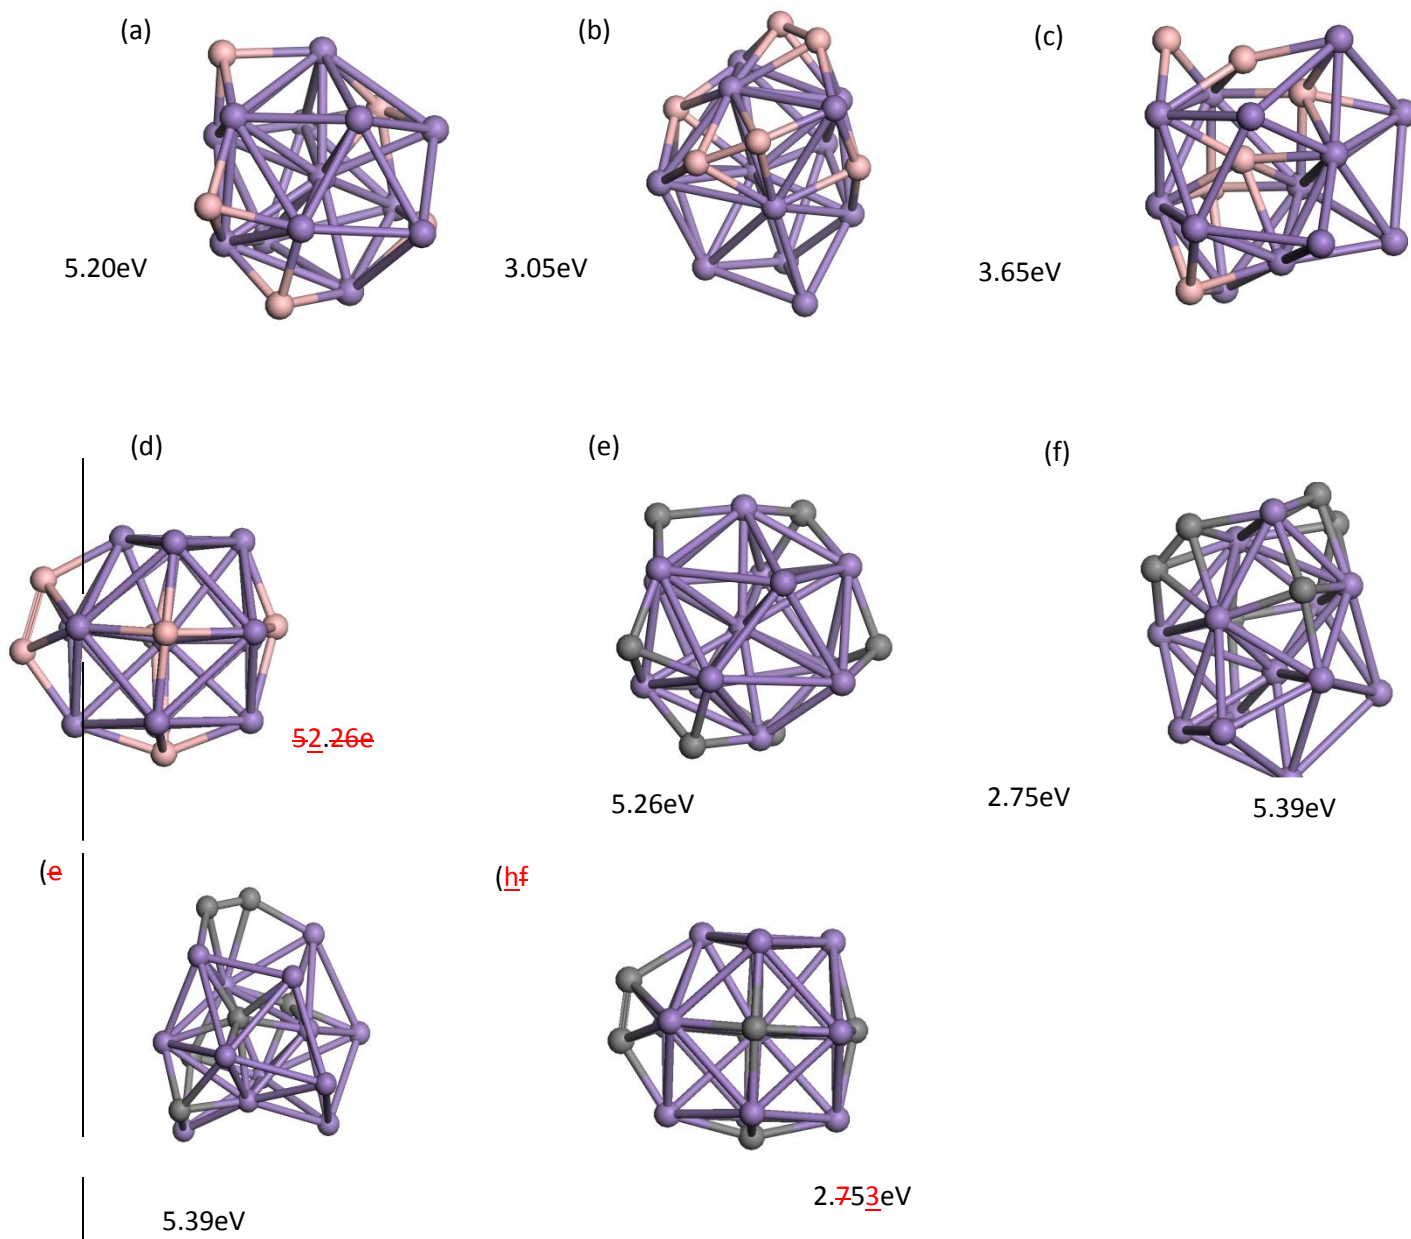

Figure S1 Relative energy of some other isomers of (a-c)dMn<sub>13</sub>B<sub>6</sub> and (d-f)Mn<sub>13</sub>C<sub>6</sub> referred to the ground-state cuboctahedral structures , ~~which (a-c, e-g)~~ are based on Ih structures doped by B or C at various locations. In (a)(d) dopants are allocated on surface separately , in (b)(e) they are grouped around the surface, and in (c)(f) one dopant atom is allocated in the center. In (d)(h) one dopant and one Mn atom swap positions in ground-state cuboctahedral structures.

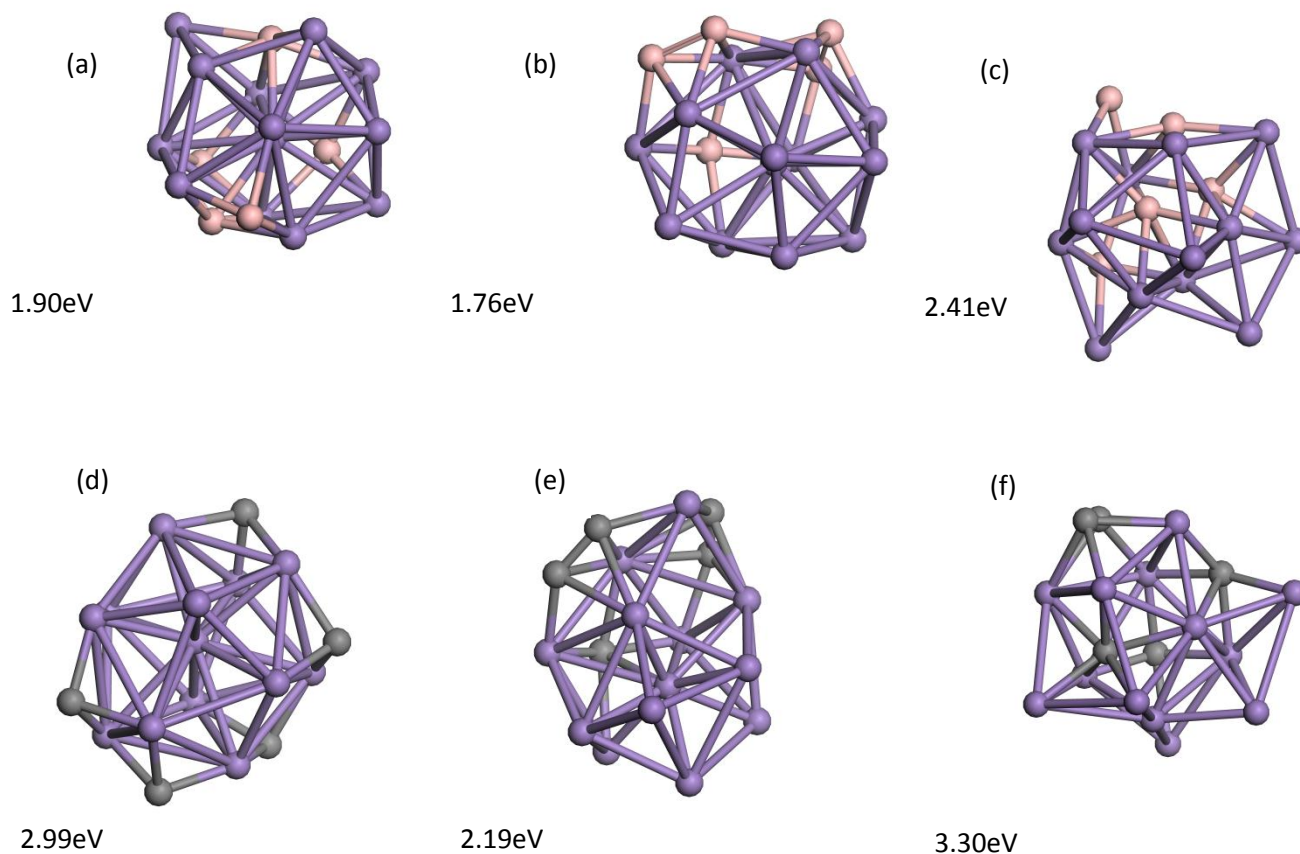

Figure S2 Relative energy of some other isomers of (a-c)Mn<sub>13</sub>B<sub>5</sub> and (d-f)Mn<sub>13</sub>C<sub>5</sub> referred to the ground-state respective cuboctahedral structures , which are based on Ih structures doped by B or C at various

locations. In (a)(d) dopants are allocated on surface separately , in (b)(e) they are grouped on the surface, and in (c)(f) one dopant atom is allocated in the center.
